# Supplementary material for: Exploring flowery MnO2/Ag nanocomposite as an efficient solar-light-driven photocatalyst
Source: Royal Society of Chemistry journal article supplement (doi:10.1039/d1nj04880e), 2022-01-01
Supplement: d1nj04880e1.pdf [file d1nj04880e1.pdf]

## **Electronic Supplementary Information**

### **Exploring flowery MnO<sub>2</sub>/Ag nanocomposites as an efficient solar light driven photocatalyst**

Arnab Samanta,<sup>a</sup> Samir Kumar Pal<sup>a,b</sup> and Subhra Jana<sup>a,b\*</sup>

<sup>a</sup>Department of Chemical, Biological & Macro-Molecular Sciences, <sup>b</sup>Technical Research Centre, S. N. Bose National Centre for Basic Sciences, Block - JD, Sector-III, Salt Lake, Kolkata -700 106, India.

E-mail: subhra.jana@bose.res.in, subhra.jana@gmail.com

## **Materials**

All chemicals were used as received. Potassium permanganate ( $\text{KMnO}_4$ ), silver nitrate ( $\text{AgNO}_3$ ), toluene, ethanol, sodium azide and hydrogen peroxide were received from Merck. Sodium hydroxide ( $\text{NaOH}$ ), methylene blue (MB) and eosin yellow (EY) were obtained from Sisco Research Laboratory (SRL), India. tert-Butanol (t-BA) and triethanolamine (TEA) were purchased from Spectrochem India. Halloysite nanotubes (HNTs) were received from Sigma-Aldrich and (3-aminopropyl)triethoxysilane was purchased from Alfa Aesar.

## **Characterization**

The surface morphology of prepared nanocomposites was observed via a field emission scanning electron microscopy (FESEM: FEI QUANTA FEG 250) and transmission electron microscopy (TEM: FEI TECNAI G2 F20-ST) after drop casting a drop of solution on a silicon wafer and a carbon coated copper grid respectively. High resolution transmission electron microscopy (HRTEM) and Energy dispersive X-ray spectroscopy (EDS) analyses were performed in the above-mentioned TEM using an accelerating voltage of 200 kV. Powder X-ray diffraction (XRD) patterns were recorded on a RIGAKU MiniFlex II powder diffractometer using  $\text{Cu K}\alpha$  radiation with 35 kV beam voltage and 15 mA beam current. Inductively coupled plasma optical emission spectrometry (ICP-OES) analysis was carried out using the PerkinElmer ICP-OES instrument (PerkinElmer, Inc., Shelton, CT, USA). Specific surface area was determined by the BET method using nitrogen adsorption/desorption isotherms at 77 K with 3flex Micromeritics analyzer. X-ray photoelectron spectroscopy (XPS) was carried out using a monochromatized  $\text{Al K}\alpha$  (1486.6 eV) as X-ray source (Omicron Nanotechnology instrument). The UV-visible diffuse

reflectance absorption spectrum of the nanocomposites was obtained using the same spectrophotometer (Shimadzu) equipped with a diffuse reflectance accessory.

### **Surface functionalization of halloysite nanotubes (HNTs)**

Organosilane grafted halloysite nanotubes were synthesized according to the following procedure. The grafting reaction was carried out under nitrogen atmosphere using standard air free techniques. A total of 3.0 g of HNTs was taken in a 50 mL three-necked round-bottom flask containing 15.0 mL of toluene. Afterward, the reaction flux was fixed with a rubber septum, condenser, thermocouple adaptor, and additional quartz sheath in which a thermocouple was inserted. The reaction mixture was deaerated for 30 min under nitrogen at room temperature, followed by heated with a heating mantle. Then, 1.5 mL of (3-aminopropyl) triethoxysilane was injected into the reaction flask at 60 °C under stirring condition and refluxed for 20 h. Finally, the as-synthesized product was collected through filtration and washed several times with toluene and ethanol, respectively. The obtained product was dried at 100 °C overnight under vacuum.

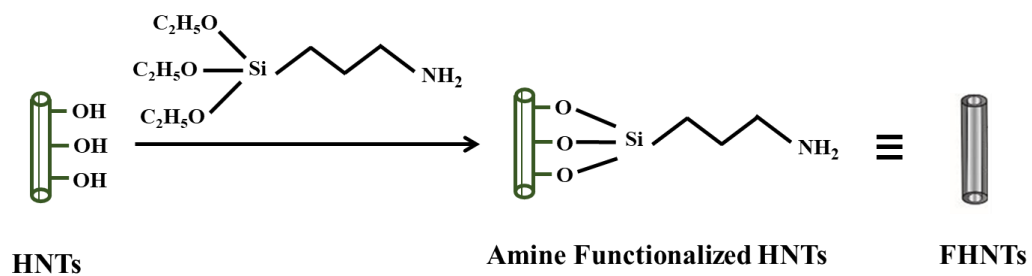

**Fig. S1** Schematic presentation of the functionalization of the surface of the halloysite nanotubes (HNTs) through grafting of an aminosilane leading to the formation of amine functionalized HNTs (FHNTs).

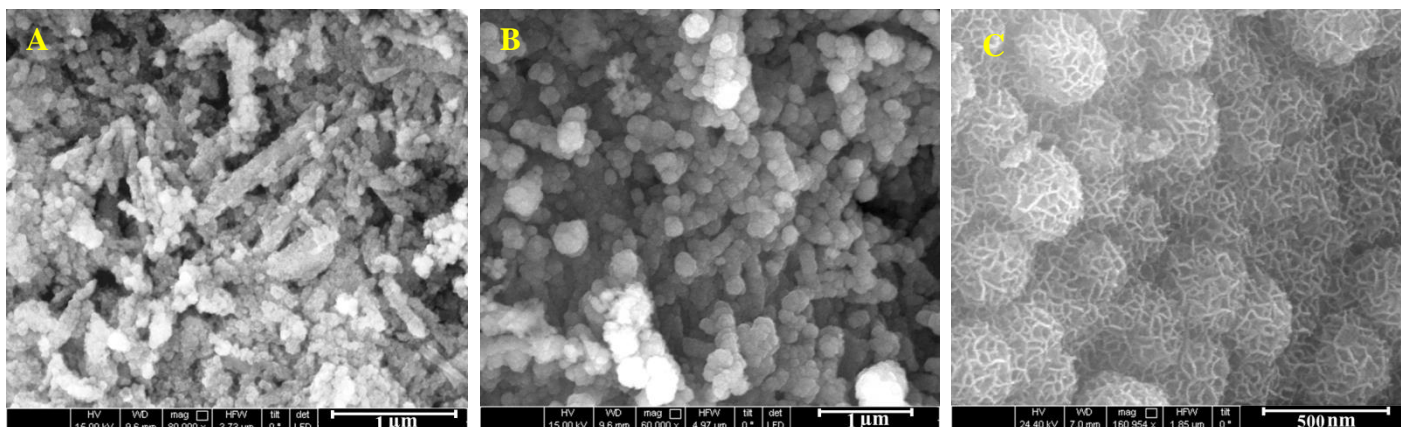

**Fig. S2** Time dependent growth of MnO<sub>2</sub> NCs over the surface of FHNTs, clearly indicates the formation of MnO<sub>2</sub> flowery nanostructures. FESEM images of the intermediates during the formation of flower-like MnO<sub>2</sub> NCs at different reaction times, (A) 2 h, (B) 5 h and (C) 10 h.

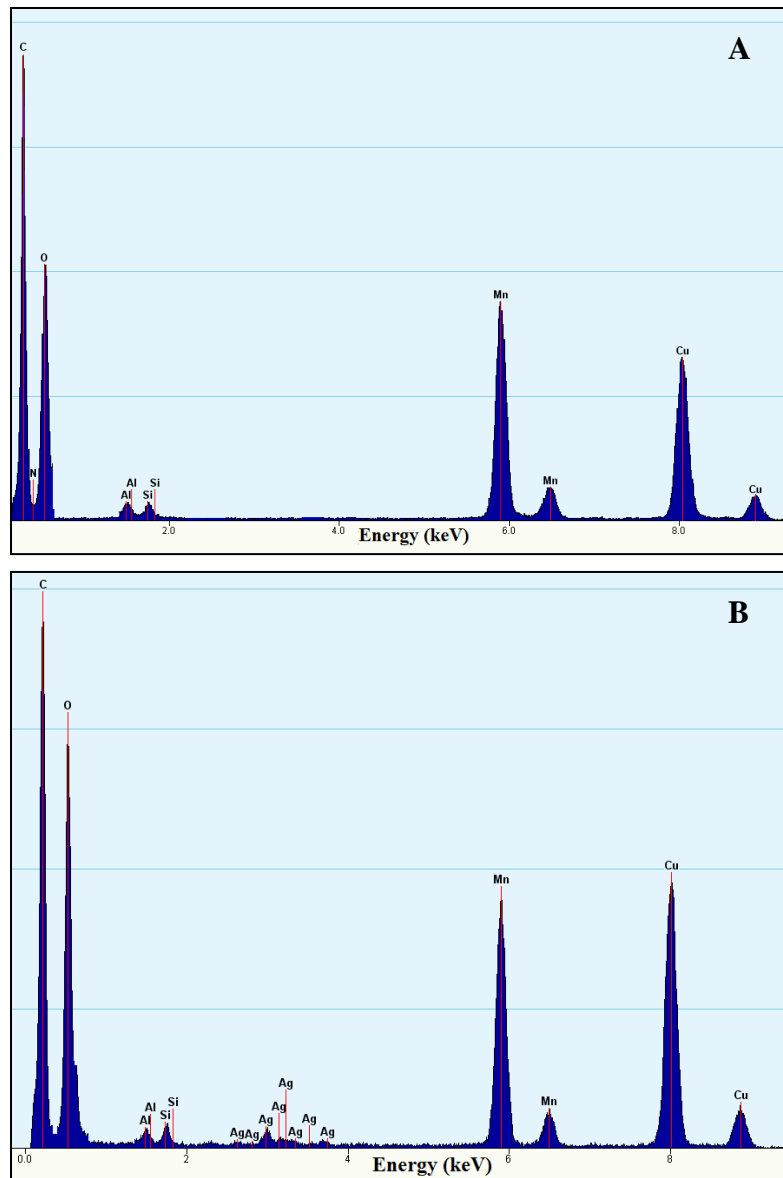

**Fig. S3** EDS spectra of (A) MnO<sub>2</sub> and (B) MnO<sub>2</sub>/Ag NCs. In EDS spectrum of MnO<sub>2</sub>/Ag NCs, new signals are observed for Ag together with the previously observed peaks for pristine MnO<sub>2</sub>.

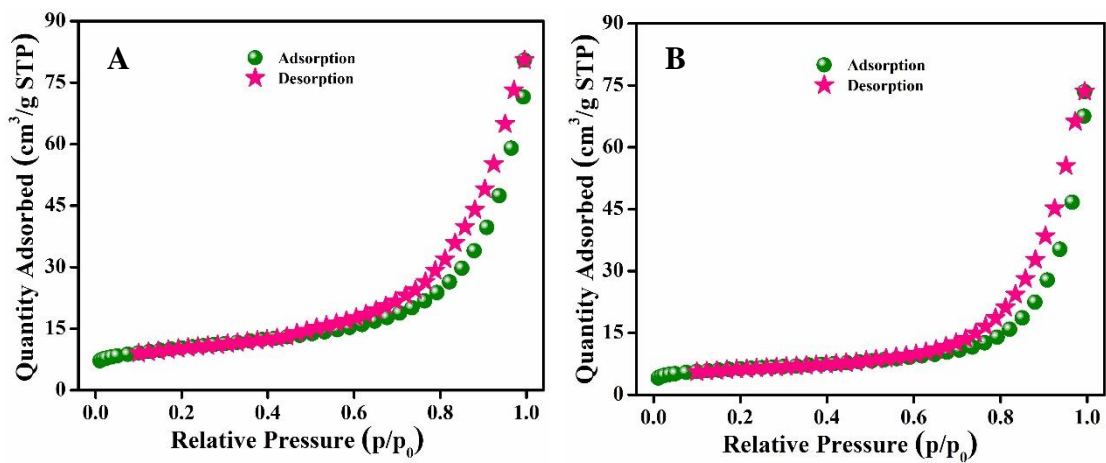

**Fig. S4** The nitrogen adsorption-desorption isotherms of (A) MnO<sub>2</sub> and (B) MnO<sub>2</sub>/Ag NCs.

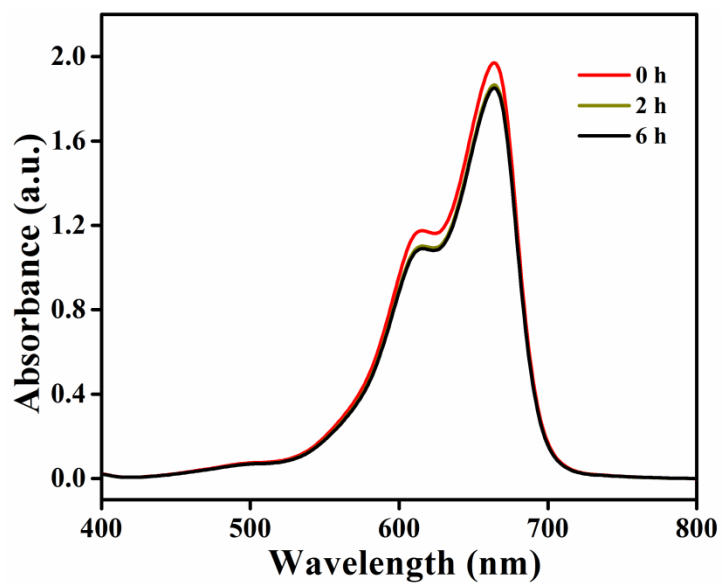

**Fig S5.** UV-Visible absorption spectra of MB during the adsorption-desorption equilibrium study by MnO<sub>2</sub>/Ag NCs as a function of time. An adsorption of ~7% of MB was observed during the adsorption-desorption equilibration under dark condition.



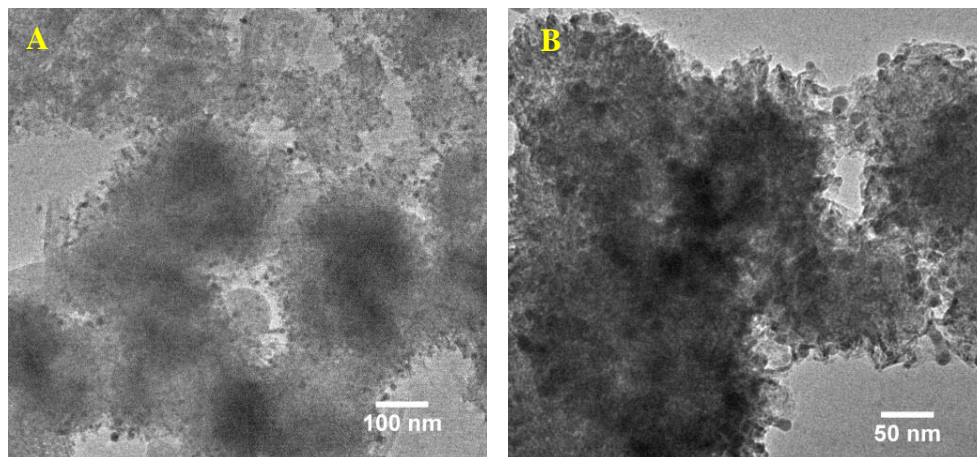

**Fig. S6** TEM micrographs of MnO<sub>2</sub>/Ag NCs after photocatalysis.

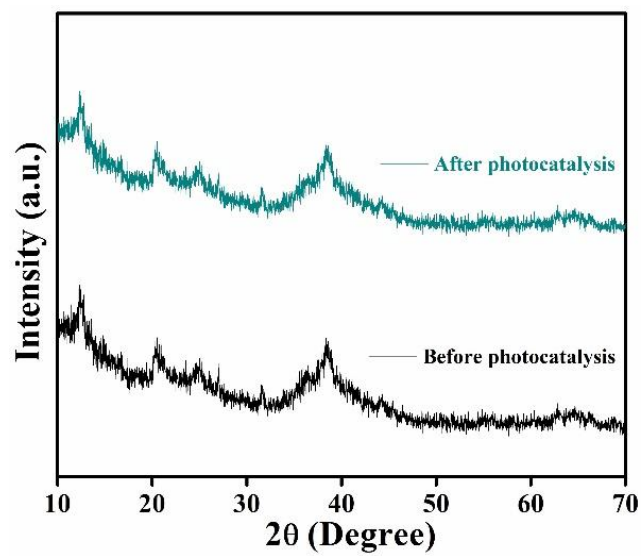

**Fig. S7** XRD patterns of MnO<sub>2</sub>/Ag NCs before and after photocatalysis.

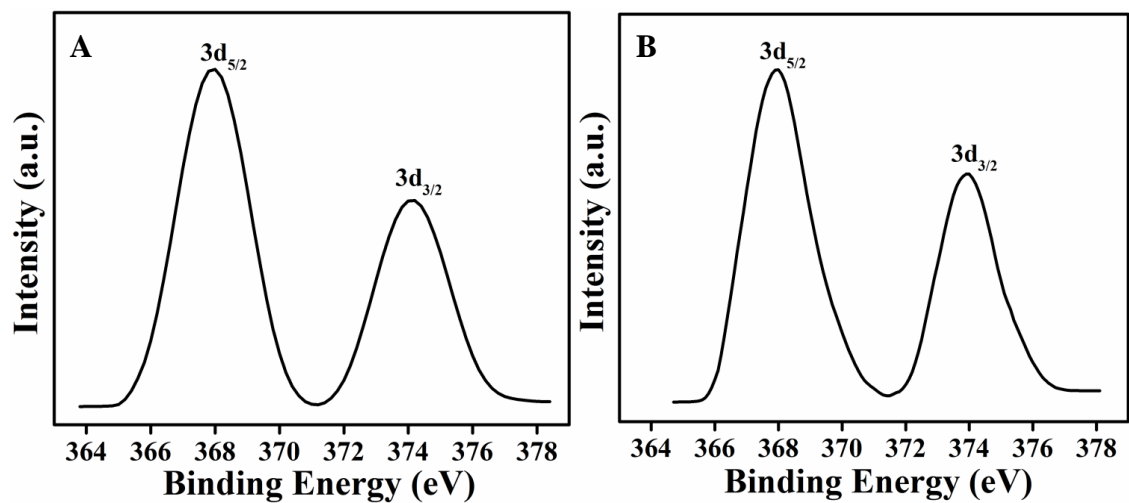

**Fig. S8** XPS spectra of Ag 3d in MnO<sub>2</sub>/Ag (A) before and (B) after photocatalytic experiment.

**Table S1** Comparison of the degradation efficiency of MnO<sub>2</sub>/Ag NCs with the other reported MnO<sub>2</sub> based catalysts for the degradation of methylene blue.

| Catalysts                                                                    | Irradiation Time (min) | Degradation Efficiency (%) | References          |
|------------------------------------------------------------------------------|------------------------|----------------------------|---------------------|
| δ-MnO <sub>2</sub> / montmorillonite                                         | 700                    | 92                         | 1                   |
| Cu doped MnO <sub>2</sub> @diatomite                                         | 240                    | 96.2                       | 2                   |
| Fe <sub>3</sub> O <sub>4</sub> @polydopamine-MnO <sub>2</sub>                | 240                    | 97.36                      | 3                   |
| MnO <sub>2</sub> /Fe <sub>3</sub> O <sub>4</sub>                             | 180                    | 98.2                       | 4                   |
| Fe <sub>3</sub> O <sub>4</sub> /SiO <sub>2</sub> /MnO <sub>2</sub> /BiOBr-Bi | 150                    | 95.23                      | 5                   |
| Polyaniline-modified MnO <sub>2</sub> composite                              | 120                    | 94                         | 6                   |
| MnO <sub>2</sub> /TiO <sub>2</sub> nanocomposite                             | 120                    | 90                         | 7                   |
| PANI-rGO-MnO <sub>2</sub>                                                    | 120                    | 90                         | 8                   |
| β-MnO <sub>2</sub>                                                           | 120                    | 90.2                       | 9                   |
| Fe/M-MnO <sub>2</sub>                                                        | 120                    | 94.8                       | 10                  |
| MnO <sub>2</sub> /CH-FP                                                      | 90                     | 95.6                       | 11                  |
| MPS-(MnO <sub>2</sub> ) nanocomposite                                        | 90                     | 89.4                       | 12                  |
| MnO <sub>2</sub> /BiVO <sub>4</sub> /GNP                                     | 60                     | 76                         | 13                  |
| Mn <sub>3</sub> O <sub>4</sub> -MnO <sub>2</sub> composite                   | 60                     | 93.5                       | 14                  |
| MnO <sub>2</sub> NCs                                                         | <b>70</b>              | <b>95.7</b>                | <b>Present Work</b> |
| MnO <sub>2</sub> /Ag NCs                                                     | <b>40</b>              | <b>96.8</b>                | <b>Present Work</b> |

**References:**

- 1 M. X. Zhu, Z. Wang, S. H. Xu and T. Li, *J. Hazard. Mater.*, 2010, **181**, 57-64.

- 2 Y. Xiao, W. Huo, S. Yin, D. Jiang, Y. Zhang, Z. Zhang, X. Liu, F. Dong, J. Wang, G. Li and X. Hu, *J. Colloid Interface Sci.*, 2019, **556**, 466-475.
- 3 X. Pan, S. Cheng, T. Su, G. Zuo, W. Zhao, X. Qi, W. Wei and W. Dong, *Colloids Surf. B Biointerfaces*, 2019, **181**, 226-233.
- 4 L. Zhang, J. Lian, L. Wu, Z. Duan, J. Jiang and L. Zhao, *Langmuir*, 2014, **30**, 7006-7013.
- 5 M. Ma, Y. Yang, Y. Chen, Y. Ma, P. Lyu, A. Cui, W. Huang, Z. Zhang, Y. Li, and F. Si, *J. Alloys Compd.*, 2021, **861**, 158256.
- 6 H. Xu, J. Zhang, Y. Chen, H. Lu, J. Zhuang and J. Li, *Mater. Lett.*, 2014, **117**, 21-23.
- 7 M. Xue, L. Huang, J. Q. Wang, Y. Wang, L. Gao, J. H. Zhu and Z. G. Zou, *Nanotechnology*, 2008, **19**, 185604.
- 8 Y. Park, A. Numan, N. Ponomarev, J. Iqbal and M. Khalid, *J. Environ. Chem. Eng.*, 2021, **9**, 106006.
- 9 G. Cheng, L. Yu, T. Lin, R. Yang, M. Sun, B. Lan, L. Yang and F. Deng, *J. Solid State Chem.*, 2014, **217**, 57-63.
- 10 R. Huang, Y. Liu, Z. Chen, D. Pan, Z. Li, M. Wu, C. H. Shek, C. L. Wu and J. K. Lai, *ACS Appl. Mater. Interfaces*, 2015, **7**, 3949-3959.
- 11 J. Yang, Z. Ao, H. Wu and S. Zhang, *Chemosphere*, 2021, **268**, 128835.
- 12 E. Thenmozhi, M. Harshavardhan, S. Kamala-Kannan and V. Janaki, *Mater. Lett.* 2022, **309**, 131367.
- 13 K. Trzcíński, M. Szkoda, M. Sawczak, J. Karczewski and A. Lisowska-Oleksiak, *Appl. Surf. Sci.*, 2016, **385**, 199-208.
- 14 J. Zhao, J. Nan, Z. Zhao, N. Li, J. Liu and F. Cui, *Appl. Catal. B Environ.*, 2017, **202**, 509-517.
